# Supplementary material
Source: PubMed Central journal article supplement (PMC9081231)
Supplement: NIHMS1780666-supplement-1.pdf [file NIHMS1780666-supplement-1.pdf]

**Page 2 - Supplemental Methods** - ICD-9 and CPT-4 Procedure Codes Utilized

**Pages 3-4 - Supplemental Methods** – Chart Abstraction Variables and Procedure Classification

**Pages 5-6 - Supplemental Table 1.** Types of Procedures Excluded From the Cohort

**Pages 7-12 - Supplemental Table 2.** Analysis of Demographic Trends by Type of First Limb-Procedure

**Page 13 - Supplemental Figure 1.** Rationale for Major Amputation as Opposed to Revascularization

**Pages 14-16 - Supplemental Table 3.** Type and Level of Revascularization for All Revascularizations

**Page 17 - Supplemental Figure 2.** Amputation Trends Among Non-PAD Patients/Etiologies Who Were Excluded From the Cohort

**Page 18 - Supplemental Figure 3.** Overall Kaplan-Meier Curves for Outcomes Following Revascularization by the Initial Mode

**Page 19 - Supplemental References**

## **Supplemental Methods - ICD-9 and CPT-4 Procedure Codes Utilized**

### **ICD-9:**

00.55, 05.23, 38.08, 38.18, 38.38, 38.48, 38.68, 38.88, 39.25/1-39.25/9, 39.29/2-39.29/6, 39.29/9, 39.31, 39.49/1-39.49/9, 39.50/2-39.50/5, 39.56-39.58, 39.59/9, 39.79, 39.90, 84.10-84.19, 99.10.

### **CPT-4:**

27290, 27295, 27590-27592, 27598, 27880-27882, 27888, 27889, 28124, 28150, 28153, 28800, 28805, 28810, 28820, 28825, 34201, 34203, 35221, 35226, 35251, 35256, 35281, 35286, 35302-35306, 35331, 35351, 35355, 35361, 35363, 35371, 35372, 35381, 35452, 35454, 35456, 35459, 35470, 35472-35474, 35481-35483, 35485, 35491-35493, 35495, 35521, 35533, 35537-35541, 35546, 35548, 35549, 35551, 35556, 35558, 35563, 35565, 35566, 35570, 35571, 35582, 35583, 35585, 35587, 35621, 35623, 35637, 35638, 35641, 35646, 35647, 35651, 35654, 35656, 35661, 35663, 35665, 35666, 35671, 35681-35683, 35685, 35686, 35700, 35721, 35741, 35761, 35875, 35876, 35879, 35881, 35883, 35884, 37220-37235, 37184-37186, 37201, 37205-37209, 64809, 64818, 75896, 75897, 75900, 75960, 75962-75965, 75992, 75993.

## **Supplemental Methods – Chart Abstraction Variables and Procedure Classification**

All chart abstraction beyond the initial ICD-9/CPT-4 search was via manual chart review. Demographic data collected included date of birth, last date of follow-up, vital status, and gender. Clinical data included indication for each procedure (highest Fontaine stage – asymptomatic, claudication, rest pain or tissue loss) and medical history at the time of the first procedure. Medical history included height, weight, smoking status, serum creatinine level, hematocrit level ( $\leq 30\%$  vs  $>30\%$ ), prior coronary artery intervention, prior kidney transplant and the presence or absence of a prior diagnosis of hypertension, dyslipidemia, chronic obstructive pulmonary disease (COPD), coronary artery disease, diabetes mellitus, congestive heart failure, stroke/transient ischemic attack (TIA)/amaurosis and end-stage renal disease. These diagnoses were based on medical record documentation by providers managing the patient at the time of the first procedure. Smoking status was classified as never, former (quit over one year ago) or current. Rationale for major amputation as opposed to revascularization was obtained via chart review from notes by involved providers prior to major amputation.

Procedure characteristics were collected and classified similar to Hallett et al <sup>1</sup>, with the exception that ankle-sparing amputations (eg, transmetatarsal) were considered minor amputations in the current study. Lumbar sympathectomy was included in our analysis to maintain continuity with the prior study by Hallett et al, though only 9 sympathectomy procedures were performed during our study period and none since 1997. Amputation revisions at the same level were excluded. Endovascular revascularizations (ENDO) consisted only of angioplasty in Hallett's study. In the current study, ENDO were classified first based on whether catheter-directed thrombolysis was performed, followed by

stenting, balloon angioplasty and finally “other” (cryoplasty, orbital atherectomy, laser atherectomy). Thrombolysis procedures spanning multiple days/sessions were counted as one procedure. Hybrid revascularizations (HYBRID) consisted of any combination of ENDO and open surgical revascularization (OPEN) techniques used on the same limb either during the same procedure or in a deliberately staged manner. OPEN procedures were classified based on whether a bypass was performed and, if not, as “other” (endarterectomy, patch angioplasty, Fogarty thrombectomy, valve lysis, sympathectomy).

Procedures involving more than one type of either ENDO or OPEN revascularization (eg, thrombolysis and angioplasty, endarterectomy and bypass) were considered “multimodal”. Level of revascularization for OPEN was classified as in Hallett et al (suprainguinal, infrainguinal but suprageniculate and infrageniculate). ENDO were classified similarly (eg, iliac angioplasty/stenting as suprainguinal, posterior tibial angioplasty as infrageniculate) with the knee joint used to distinguish supra from infrageniculate. “Multilevel” procedures characterized revascularizations that involved more than one level of revascularization with classification based on the more dominant mode of revascularization if applicable (eg, aortobifemoral bypass with profundaplasty as suprainguinal and multilevel, iliac stenting and superficial femoral artery angioplasty as suprainguinal and multilevel). If only one mode of revascularization was performed at multiple levels, the revascularization was classified based on the most distal level (eg, angioplasty of the superficial femoral artery and the anterior tibial artery as infrageniculate and multilevel). HYBRID level of revascularization was determined by the most distal level of any ENDO or OPEN portion of the procedure.

**Supplemental Table 1. Types of Procedures Excluded From the Cohort**

| <b>Reason for Exclusion</b>                             | <b>Non-Amputation<br/>(n=1,812)</b> | <b>Major Amputation<br/>(n=54)</b> | <b>Minor Amputation<br/>(n=200)</b> | <b>Total<br/>(n=2,066)</b> |
|---------------------------------------------------------|-------------------------------------|------------------------------------|-------------------------------------|----------------------------|
| Dialysis access                                         | 310                                 | 1                                  | 0                                   | 311 (15.1%)                |
| Non-Olmsted County residency                            | 211                                 | 1                                  | 0                                   | 212 (10.3%)                |
| Trauma/burn                                             | 142                                 | 13                                 | 31                                  | 186 (9.0%)                 |
| Cardiothoracic surgery                                  | 155                                 | 1                                  | 0                                   | 156 (7.6%)                 |
| Renal                                                   | 143                                 | 0                                  | 0                                   | 143 (6.9%)                 |
| Iatrogenic                                              | 95                                  | 2                                  | 0                                   | 97 (4.7%)                  |
| Abdominal aortic aneurysm                               | 90                                  | 0                                  | 4                                   | 94 (4.5%)                  |
| Soft tissue (non-diabetic)                              | 93                                  | 0                                  | 0                                   | 93 (4.5%)                  |
| Venous disease/intravenous thrombolytics                | 91                                  | 0                                  | 0                                   | 91 (4.4%)                  |
| Mesenteric/visceral                                     | 79                                  | 0                                  | 0                                   | 79 (3.8%)                  |
| Embolism (unrelated to atherosclerotic PAD)             | 61                                  | 4                                  | 0                                   | 65 (3.1%)                  |
| Diabetes (no PAD)                                       | 0                                   | 4                                  | 58                                  | 62 (3.0%)                  |
| Intra/extracranial cerebrovascular                      | 55                                  | 0                                  | 0                                   | 55 (2.7%)                  |
| Benign toe problems (eg, bunion, syndactyly, hammertoe) | 0                                   | 0                                  | 51                                  | 51 (2.5%)                  |
| Popliteal/femoral/tibial aneurysm                       | 42                                  | 0                                  | 2                                   | 44 (2.1%)                  |
| Other orthopedic (eg, infected joint prosthesis)        | 0                                   | 12                                 | 5                                   | 17 (0.8%)                  |
| Cancer                                                  | 2                                   | 8                                  | 6                                   | 16 (0.8%)                  |

**Supplemental Table 1. (Continued)**

| <b>Reason for Exclusion</b>                                           | <b>Non-<br/>Amputation<br/>(n=1,812)</b> | <b>Major<br/>Amputation<br/>(n=54)</b> | <b>Minor<br/>Amputation<br/>(n=200)</b> | <b>Total<br/>(n=2,066)</b> |
|-----------------------------------------------------------------------|------------------------------------------|----------------------------------------|-----------------------------------------|----------------------------|
| Radiation arteritis                                                   | 14                                       | 0                                      | 0                                       | 14 (0.7%)                  |
| Nondiabetic microvascular (eg, vasculitis)                            | 0                                        | 2                                      | 11                                      | 13 (0.6%)                  |
| Others (eg, vasopressor-related gangrene, Klippel-Trenaunay syndrome) | 229                                      | 6                                      | 32                                      | 267 (12.9%)                |

PAD = peripheral arterial disease.

**Supplemental Table 2. Analysis of Demographic Trends by Type of First Limb-Procedure**

| Characteristics                                     | 1990-1994   | 1995-1999   | 2000-2004   | 2005-2009   | Trend <i>P</i> <sup>a</sup> |
|-----------------------------------------------------|-------------|-------------|-------------|-------------|-----------------------------|
| <b>OPEN revascularization</b>                       | <b>n=81</b> | <b>n=90</b> | <b>n=71</b> | <b>n=46</b> |                             |
| Age, mean (SD), years                               | 69.1 (12.8) | 68.7 (12.6) | 65.3 (13.3) | 67.3 (11.8) | .28                         |
| Male gender, no. (%) <sup>b</sup>                   | 46 (56.8)   | 54 (60.0)   | 42 (59.2)   | 29 (63.0)   | .48                         |
| Non-Caucasian race/ethnicity, no. (%) <sup>b</sup>  | 0 (0.0)     | 1 (1.1)     | 3 (4.2)     | 1 (2.2)     | .12                         |
| Height, mean (SD), cm                               | 167.1 (9.6) | 167.1 (9.8) | 169.5 (9.6) | 169.2 (9.9) | .048                        |
| Weight, mean (SD), kg                               | 72.7 (15.1) | 75.7 (20.6) | 77.4 (17.4) | 79.9 (18.5) | .008                        |
| BMI, mean (SD), kg/m <sup>2</sup>                   | 25.9 (4.4)  | 26.9 (6.2)  | 26.9 (5.4)  | 27.7 (5.0)  | .054                        |
| Smoking, no. (%) <sup>b</sup>                       |             |             |             |             | .69                         |
| Never                                               | 10 (12.3)   | 16 (17.8)   | 11 (15.5)   | 3 (6.5)     |                             |
| Former                                              | 32 (39.5)   | 36 (40.0)   | 28 (39.4)   | 23 (50.0)   |                             |
| Current                                             | 39 (48.1)   | 38 (42.2)   | 32 (45.1)   | 20 (43.5)   |                             |
| Creatinine, mean (SD), mg/dL <sup>c</sup>           | 1.3 (1.0)   | 1.4 (0.8)   | 1.3 (0.9)   | 1.4 (1.2)   | .47                         |
| Hematocrit $\leq$ 30%, no. (%) <sup>b</sup>         | 5 (6.2)     | 8 (8.9)     | 4 (5.6)     | 3 (6.5)     | .82                         |
| Prevent III score, mean (SD)                        | 2.4 (2.3)   | 2.7 (2.2)   | 2.3 (2.1)   | 2.5 (2.1)   | .97                         |
| Prior coronary intervention, no. (%) <sup>b</sup>   | 10 (12.3)   | 21 (23.3)   | 18 (25.4)   | 10 (21.7)   | .06                         |
| Functioning kidney transplant, no. (%) <sup>b</sup> | 1 (1.2)     | 2 (2.2)     | 1 (1.4)     | 1 (2.2)     | .79                         |
| Comorbidities, no. (%) <sup>b</sup>                 |             |             |             |             |                             |
| Dyslipidemia                                        | 32 (39.5)   | 42 (46.7)   | 49 (69.0)   | 37 (80.4)   | <.001                       |
| Hypertension                                        | 51 (63.0)   | 70 (77.8)   | 57 (80.3)   | 39 (84.8)   | .001                        |

**Supplemental Table 2. (Continued)**

| <b>Characteristics</b>                             | <b>1990-1994</b> | <b>1995-1999</b> | <b>2000-2004</b> | <b>2005-2009</b> | <b>Trend <i>P</i><sup>a</sup></b> |
|----------------------------------------------------|------------------|------------------|------------------|------------------|-----------------------------------|
| Diabetes mellitus                                  | 28 (34.6)        | 32 (35.6)        | 19 (26.8)        | 15 (32.6)        | .88                               |
| Coronary artery disease                            | 31 (38.3)        | 43 (47.8)        | 33 (46.5)        | 24 (52.2)        | .07                               |
| Congestive heart failure                           | 9 (11.1)         | 13 (14.4)        | 5 (7.0)          | 6 (13.0)         | .84                               |
| Stroke/TIA/amaurosis                               | 23 (28.4)        | 23 (25.6)        | 11 (15.5)        | 11 (23.9)        | .25                               |
| COPD                                               | 18 (22.2)        | 26 (28.9)        | 16 (22.5)        | 10 (21.7)        | .55                               |
| End-stage renal disease                            | 3 (3.7)          | 2 (2.2)          | 2 (2.8)          | 2 (4.3)          | .73                               |
| <b>ENDO/HYBRID revascularization</b>               | <b>n=37</b>      | <b>n=53</b>      | <b>n=80</b>      | <b>n=139</b>     |                                   |
| Age, mean (SD), years                              | 67.5 (13.2)      | 69.3 (12.4)      | 68.7 (12.4)      | 67.4 (12.1)      | .48                               |
| Male gender, no. (%) <sup>b</sup>                  | 25 (67.6)        | 26 (49.1)        | 41 (51.3)        | 84 (60.4)        | .71                               |
| Non-Caucasian race/ethnicity, no. (%) <sup>b</sup> | 1 (2.7)          | 3 (5.7)          | 3 (3.8)          | 7 (5.0)          | .42                               |
| Height, mean (SD), cm                              | 167.0 (8.2)      | 165.1 (7.9)      | 167.9 (10.8)     | 169.2 (10.2)     | .02                               |
| Weight, mean (SD), kg                              | 78.6 (20.7)      | 74.1 (18.0)      | 77.2 (19.6)      | 81.7 (20.5)      | .06                               |
| BMI, mean (SD), kg/m <sup>2</sup>                  | 28.0 (6.4)       | 27.1 (5.9)       | 27.2 (5.5)       | 28.3 (5.7)       | .34                               |
| Smoking, no. (%) <sup>b</sup>                      |                  |                  |                  |                  | .12                               |
| Never                                              | 8 (21.6)         | 8 (15.1)         | 14 (17.5)        | 18 (12.9)        |                                   |
| Former                                             | 20 (54.1)        | 22 (41.5)        | 35 (43.8)        | 66 (47.5)        |                                   |
| Current                                            | 9 (24.3)         | 23 (43.4)        | 31 (38.8)        | 55 (39.6)        |                                   |
| Creatinine, mean (SD), mg/dL <sup>c</sup>          | 1.2 (0.3)        | 1.7 (2.1)        | 1.3 (0.9)        | 1.3 (1.2)        | .36                               |
| Hematocrit ≤30%, no. (%) <sup>b</sup>              | 2 (5.4)          | 3 (5.7)          | 5 (6.3)          | 9 (6.5)          | .72                               |



**Supplemental Table 2. (Continued)**

| <b>Characteristics</b>                              | <b>1990-1994</b> | <b>1995-1999</b> | <b>2000-2004</b> | <b>2005-2009</b> | <b>Trend <i>P</i><sup>a</sup></b> |
|-----------------------------------------------------|------------------|------------------|------------------|------------------|-----------------------------------|
| Prevent III score, mean (SD)                        | 2.3 (2.1)        | 2.5 (2.1)        | 2.4 (2.4)        | 2.1 (2.1)        | .49                               |
| Prior coronary intervention, no. (%) <sup>b</sup>   | 9 (24.3)         | 11 (20.8)        | 25 (31.3)        | 47 (33.8)        | .04                               |
| Functioning kidney transplant, no. (%) <sup>b</sup> | 1 (2.7)          | 0 (0.0)          | 3 (3.8)          | 2 (1.4)          | .99                               |
| <b>Comorbidities, no. (%)<sup>b</sup></b>           |                  |                  |                  |                  |                                   |
| Dyslipidemia                                        | 13 (35.1)        | 27 (50.9)        | 52 (65.0)        | 109 (78.4)       | <.001                             |
| Hypertension                                        | 28 (75.7)        | 35 (66.0)        | 64 (80.0)        | 121 (87.1)       | .009                              |
| Diabetes mellitus                                   | 17 (45.9)        | 25 (47.2)        | 26 (32.5)        | 51 (36.7)        | .26                               |
| Coronary artery disease                             | 16 (43.2)        | 23 (43.4)        | 38 (47.5)        | 69 (49.6)        | .26                               |
| Congestive heart failure                            | 6 (16.2)         | 9 (17.0)         | 11 (13.8)        | 18 (12.9)        | .45                               |
| Stroke/TIA/amaurosis                                | 8 (21.6)         | 11 (20.8)        | 18 (22.5)        | 23 (16.5)        | .33                               |
| COPD                                                | 6 (16.2)         | 10 (18.9)        | 16 (20.0)        | 29 (20.9)        | .72                               |
| End-stage renal disease                             | 0 (0.0)          | 3 (5.7)          | 1 (1.3)          | 6 (4.3)          | .43                               |
| <b>Major amputation</b>                             | <b>n=25</b>      | <b>n=26</b>      | <b>n=15</b>      | <b>n=8</b>       |                                   |
| Age, mean (SD), years                               | 76.2 (11.1)      | 75.8 (10.6)      | 70.1 (19.7)      | 77.8 (8.6)       | .76                               |
| Male gender, no. (%) <sup>b</sup>                   | 13 (52.0)        | 18 (69.2)        | 7 (46.7)         | 4 (50.0)         | .76                               |
| Non-Caucasian race/ethnicity, no. (%) <sup>b</sup>  | 0 (0.0)          | 0 (0.0)          | 0 (0.0)          | 1 (12.5)         | .20                               |
| Height, mean (SD), cm                               | 168.0 (11.3)     | 166.9 (11.8)     | 169.0 (9.6)      | 168.8 (12.1)     | .83                               |
| Weight, mean (SD), kg                               | 68.8 (22.7)      | 71.7 (20.3)      | 71.9 (15.7)      | 72.5 (15.6)      | .62                               |
| BMI, mean (SD), kg/m <sup>2</sup>                   | 24.1 (6.1)       | 25.6 (5.9)       | 25.4 (6.0)       | 25.6 (6.2)       | .49                               |

**Supplemental Table 2. (Continued)**

| <b>Characteristics</b>                              | <b>1990-1994</b> | <b>1995-1999</b> | <b>2000-2004</b> | <b>2005-2009</b> | <b>Trend <i>P</i><sup>a</sup></b> |
|-----------------------------------------------------|------------------|------------------|------------------|------------------|-----------------------------------|
| Smoking, no. (%) <sup>b</sup>                       |                  |                  |                  |                  | .09                               |
| Never                                               | 8 (32.0)         | 8 (30.8)         | 7 (46.7)         | 5 (62.5)         |                                   |
| Former                                              | 11 (44.0)        | 12 (46.2)        | 7 (46.7)         | 2 (25.0)         |                                   |
| Current                                             | 6 (24.0)         | 6 (23.1)         | 1 (6.7)          | 1 (12.5)         |                                   |
| Creatinine, mean (SD), mg/dL <sup>c</sup>           | 1.5 (1.0)        | 1.8 (1.3)        | 1.6 (0.7)        | 0.8 (0.3)        | .14                               |
| Hematocrit $\leq$ 30%, no. (%) <sup>b</sup>         | 8 (32.0)         | 8 (30.8)         | 3 (20.0)         | 3 (37.5)         | .65                               |
| Prevent III score, mean (SD)                        | 5.2 (1.5)        | 5.5 (1.6)        | 6.3 (1.9)        | 5.5 (1.9)        | .19                               |
| Prior coronary intervention, no. (%) <sup>b</sup>   | 4 (16.0)         | 6 (23.1)         | 3 (20.0)         | 2 (25.0)         | .70                               |
| Functioning kidney transplant, no. (%) <sup>b</sup> | 0 (0.0)          | 0 (0.0)          | 4 (26.7)         | 0 (0.0)          | .052                              |
| Comorbidities, no. (%) <sup>b</sup>                 |                  |                  |                  |                  |                                   |
| Dyslipidemia                                        | 6 (24.0)         | 7 (26.9)         | 10 (66.7)        | 7 (87.5)         | <.001                             |
| Hypertension                                        | 14 (56.0)        | 20 (76.9)        | 12 (80.0)        | 5 (62.5)         | .36                               |
| Diabetes mellitus                                   | 11 (44.0)        | 18 (69.2)        | 9 (60.0)         | 3 (37.5)         | .81                               |
| Coronary artery disease                             | 16 (64.0)        | 16 (61.5)        | 9 (60.0)         | 2 (25.0)         | .08                               |
| Congestive heart failure                            | 10 (40.0)        | 14 (53.8)        | 4 (26.7)         | 3 (37.5)         | .78                               |
| Stroke/TIA/amaurosis                                | 10 (40.0)        | 13 (50.0)        | 8 (53.3)         | 3 (37.5)         | .90                               |
| COPD                                                | 6 (24.0)         | 8 (30.8)         | 3 (20.0)         | 2 (25.0)         | .68                               |
| End-stage renal disease                             | 1 (4.0)          | 3 (11.5)         | 2 (13.3)         | 0 (0.0)          | .97                               |
| <b>Minor amputation</b>                             | <b>n=36</b>      | <b>n=28</b>      | <b>n=32</b>      | <b>n=21</b>      |                                   |

## Supplemental Table 2. (Continued)

| Characteristics                                     | 1990-1994   | 1995-1999    | 2000-2004    | 2005-2009    | Trend <i>P</i> <sup>a</sup> |
|-----------------------------------------------------|-------------|--------------|--------------|--------------|-----------------------------|
| Age, mean (SD), years                               | 70.6 (13.8) | 66.8 (16.2)  | 67.7 (14.8)  | 68.0 (15.0)  | .64                         |
| Male gender, no. (%) <sup>b</sup>                   | 20 (55.6)   | 20 (71.4)    | 22 (68.8)    | 13 (61.9)    | .77                         |
| Non-Caucasian race/ethnicity, no. (%) <sup>b</sup>  | 1 (2.8)     | 1 (3.6)      | 2 (6.3)      | 3 (14.3)     | .09                         |
| Height, mean (SD), cm                               | 166.0 (9.9) | 170.7 (10.9) | 171.6 (13.0) | 172.8 (10.1) | .03                         |
| Weight, mean (SD), kg                               | 77.8 (20.6) | 75.9 (17.3)  | 82.1 (25.5)  | 93.0 (30.8)  | .006                        |
| BMI, mean (SD), kg/m <sup>2</sup>                   | 28.1 (6.6)  | 26.0 (4.7)   | 27.5 (7.3)   | 31.1 (10.2)  | .051                        |
| Smoking, no. (%) <sup>b</sup>                       |             |              |              |              | .002                        |
| Never                                               | 18 (50.0)   | 13 (46.4)    | 9 (28.1)     | 5 (23.8)     |                             |
| Former                                              | 14 (38.9)   | 12 (42.9)    | 14 (43.8)    | 9 (42.9)     |                             |
| Current                                             | 4 (11.1)    | 3 (10.7)     | 9 (28.1)     | 7 (33.3)     |                             |
| Creatinine, mean (SD), mg/dL <sup>c</sup>           | 1.3 (0.5)   | 2.0 (1.3)    | 2.1 (1.9)    | 1.7 (1.8)    | .23                         |
| Hematocrit ≤30%, no. (%) <sup>b</sup>               | 5 (13.9)    | 10 (35.7)    | 5 (15.6)     | 7 (33.3)     | .36                         |
| Prevent III score, mean (SD)                        | 4.8 (1.5)   | 5.1 (1.9)    | 4.6 (1.3)    | 5.2 (2.2)    | .89                         |
| Prior coronary intervention, no. (%) <sup>b</sup>   | 7 (19.4)    | 5 (17.9)     | 10 (31.3)    | 4 (19.0)     | .49                         |
| Functioning kidney transplant, no. (%) <sup>b</sup> | 2 (5.6)     | 2 (7.1)      | 1 (3.1)      | 1 (4.8)      | .48                         |
| Comorbidities, no. (%) <sup>b</sup>                 |             |              |              |              |                             |
| Dyslipidemia                                        | 7 (19.4)    | 11 (39.3)    | 18 (56.3)    | 15 (71.4)    | <.001                       |
| Hypertension                                        | 22 (61.1)   | 24 (85.7)    | 29 (90.6)    | 21 (100.0)   | <.001                       |
| Diabetes mellitus                                   | 31 (86.1)   | 18 (64.3)    | 23 (71.9)    | 16 (76.2)    | .51                         |

## Supplemental Table 2. (Continued)

| Characteristics          | 1990-1994 | 1995-1999 | 2000-2004 | 2005-2009 | Trend <i>P</i> <sup>a</sup> |
|--------------------------|-----------|-----------|-----------|-----------|-----------------------------|
| Coronary artery disease  | 15 (41.7) | 15 (53.6) | 16 (50.0) | 10 (47.6) | .59                         |
| Congestive heart failure | 10 (27.8) | 3 (10.7)  | 8 (25.0)  | 5 (23.8)  | .99                         |
| Stroke/TIA/amaurosis     | 6 (16.7)  | 9 (32.1)  | 1 (3.1)   | 5 (23.8)  | .99                         |
| COPD                     | 4 (11.1)  | 4 (14.3)  | 7 (21.9)  | 1 (4.8)   | .79                         |
| End-stage renal disease  | 0 (0.0)   | 3 (10.7)  | 4 (12.5)  | 2 (9.5)   | .19                         |

BMI = body mass index; COPD = chronic obstructive pulmonary disease, ENDO = endovascular revascularization; TIA = transient ischemic attack.

<sup>a</sup> Calculated using unadjusted regression models (linear regression for continuous characteristics, logistic regression for binary characteristics, and cumulative logistic regression for the ordinal characteristic, smoking). Calendar year was defined as a continuous variable between 0 (1990) and 19 (2009).

<sup>b</sup> Percentages have been rounded and may not total 100.

<sup>c</sup> To convert serum creatinine to  $\mu\text{mol/L}$ , multiply values by 88.4.

**Supplemental Figure 1. Rationale for Major Amputation as Opposed to Revascularization<sup>a</sup>**

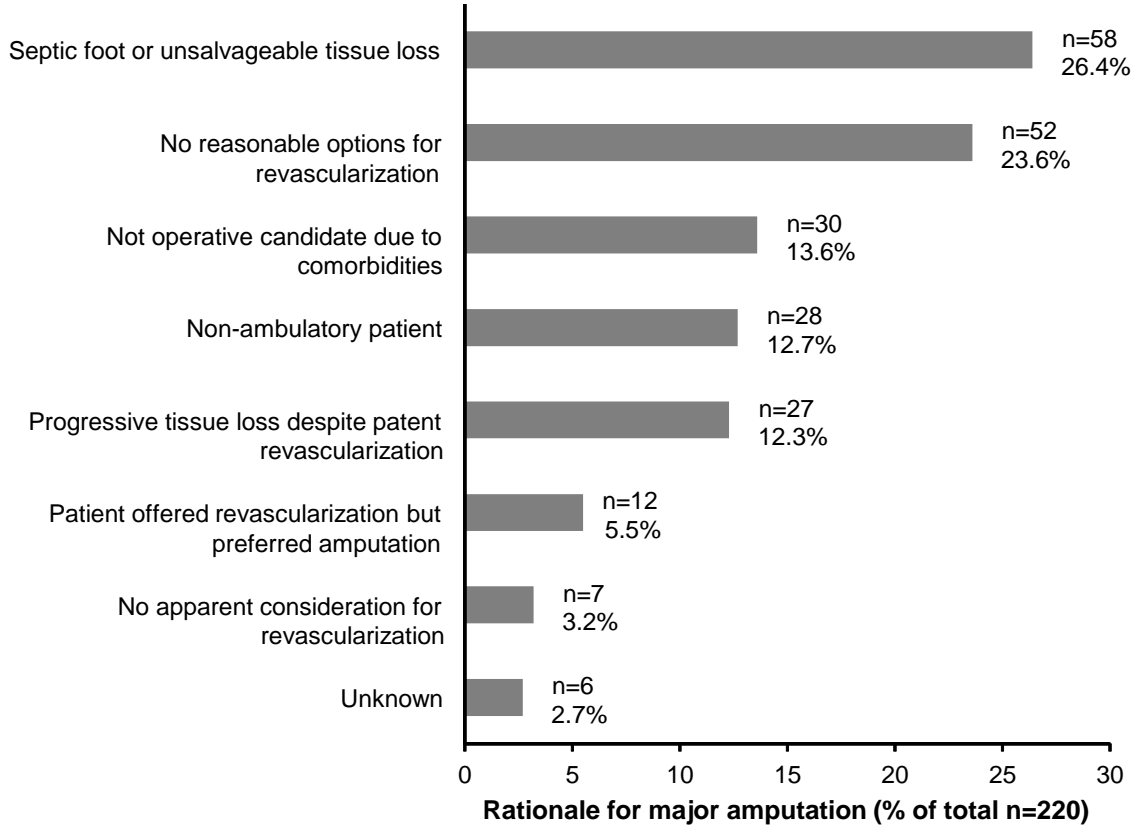

<sup>a</sup> Rationale for major amputation was ranked from highest to lowest severity as: 1) septic foot or unsalvageable tissue loss, 2) non-ambulatory patient, 3) not operative candidate due to comorbidities, 4) no reasonable options for revascularization, 5) progressive tissue loss despite patent revascularization, 6) patient offered revascularization but preferred amputation, and 7) no apparent consideration for revascularization. This ranking was used in a cumulative logistic model to assess changes in rationale over time. The 6 patients with unknown rationale were not included in the model

**Supplemental Table 3. Type and level of revascularization for all revascularizations**

| <b>Revascularizations</b>         | <b>No. / Denominator (%)</b> |
|-----------------------------------|------------------------------|
| <b>Open</b>                       | 689                          |
| Bypass                            | 564 / 689 (81.9%)            |
| Multimodal                        | 235 / 564 (41.7%)            |
| Suprainguinal                     | 272 / 564 (48.2%)            |
| Multilevel                        | 105 / 272 (38.6%)            |
| Infrainguinal but suprageniculate | 74 / 564 (13.1%)             |
| Multilevel                        | 10 / 74 (13.5%)              |
| Infrageniculate                   | 218 / 564 (38.6%)            |
| Multilevel                        | 39 / 218 (17.9%)             |
| Other                             | 125 / 689 (18.1%)            |
| Multimodal                        | 34 / 125 (27.2%)             |
| Suprainguinal                     | 10 / 125 (8.0%)              |
| Multilevel                        | 0 / 10 (0.0%)                |
| Infrainguinal but suprageniculate | 70 / 125 (56.0%)             |
| Multilevel                        | 22 / 70 (31.4%)              |
| Infrageniculate                   | 36 / 125 (28.8%)             |
| Multilevel                        | 30 / 36 (83.3%)              |
| Sympathectomy alone               | 9 / 125 (7.2%)               |
| <b>Endovascular</b>               | 611                          |

**Supplemental Table 3. (Continued)**

| <b>Revascularizations</b>         | <b>No. / Denominator (%)</b> |
|-----------------------------------|------------------------------|
| Catheter-directed Thrombolysis    | 56 / 611 (9.2%)              |
| Multimodal                        | 39 / 56 (69.6%)              |
| Suprainguinal                     | 5 / 56 (8.9%)                |
| Multilevel                        | 0 / 5 (0.0%)                 |
| Infrainguinal but suprageniculate | 17 / 56 (30.4%)              |
| Multilevel                        | 6 / 17 (35.3%)               |
| Infrageniculate                   | 34 / 56 (60.7%)              |
| Multilevel                        | 31 / 34 (91.2%)              |
| Stent                             | 300 / 611 (49.1%)            |
| Multimodal                        | 300 / 300 (100.0%)           |
| Suprainguinal                     | 242 / 300 (80.7%)            |
| Multilevel                        | 12 / 242 (5.0%)              |
| Infrainguinal but suprageniculate | 56 / 300 (18.7%)             |
| Multilevel                        | 13 / 56 (23.2%)              |
| Infrageniculate                   | 2 / 300 (0.7%)               |
| Multilevel                        | 2 / 2 (100.0%)               |
| Balloon Angioplasty               | 254 / 611 (41.6%)            |
| Multimodal                        | 9 / 254 (3.5%)               |
| Suprainguinal                     | 51 / 254 (20.1%)             |

**Supplemental Table 3. (Continued)**

| <b>Revascularizations</b>        | <b>No. / Denominator (%)</b> |
|----------------------------------|------------------------------|
| Multilevel                       | 0 / 51 (0.0%)                |
| Infringuinal but suprageniculate | 112 / 254 (44.1%)            |
| Multilevel                       | 6 / 112 (5.4%)               |
| Infrageniculate                  | 91 / 254 (35.8%)             |
| Multilevel                       | 55 / 91 (60.4%)              |
| Other                            | 1 / 611 (0.2%)               |
| Multimodal                       | 0 / 1 (0.0%)                 |
| Suprainguinal                    | 0 / 1 (0.0%)                 |
| Infringuinal but suprageniculate | 1 / 1 (100.0%)               |
| Multilevel                       | 0 / 1 (0.0%)                 |
| Infrageniculate                  | 0 / 1 (0.0%)                 |
| <b>Hybrid</b>                    | 74                           |
| Multimodal                       | 74 / 74 (100.0%)             |
| Suprainguinal                    | 5 / 74 (6.8%)                |
| Multilevel                       | 0 / 5 (0.0%)                 |
| Infringuinal but suprageniculate | 38 / 74 (51.4%)              |
| Multilevel                       | 31 / 38 (81.6%)              |
| Infrageniculate                  | 31 / 74 (41.9%)              |
| Multilevel                       | 31 / 31 (100.0%)             |



**Supplemental Figure 2. Amputation Trends Among Non-PAD Patients/Etiologies Who Were Excluded From the Cohort**

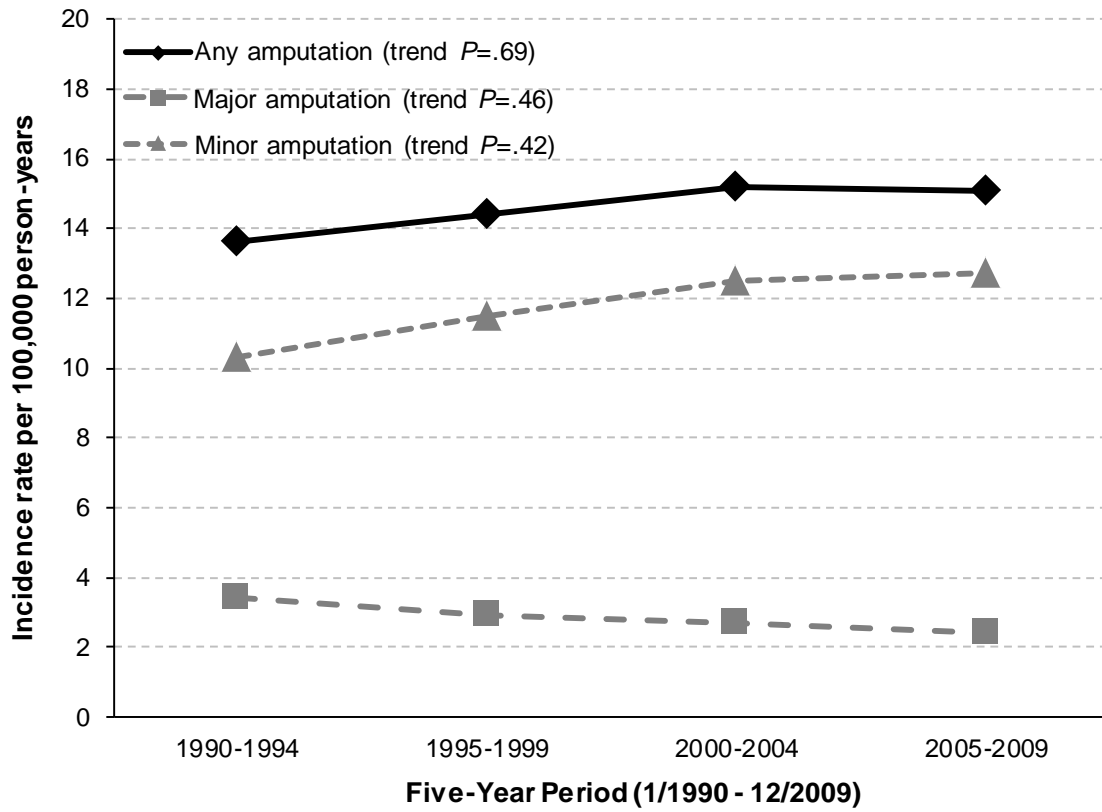

**Supplemental Figure 3.** Overall Kaplan-Meier Curves for Outcomes Following Revascularization by the Initial Mode

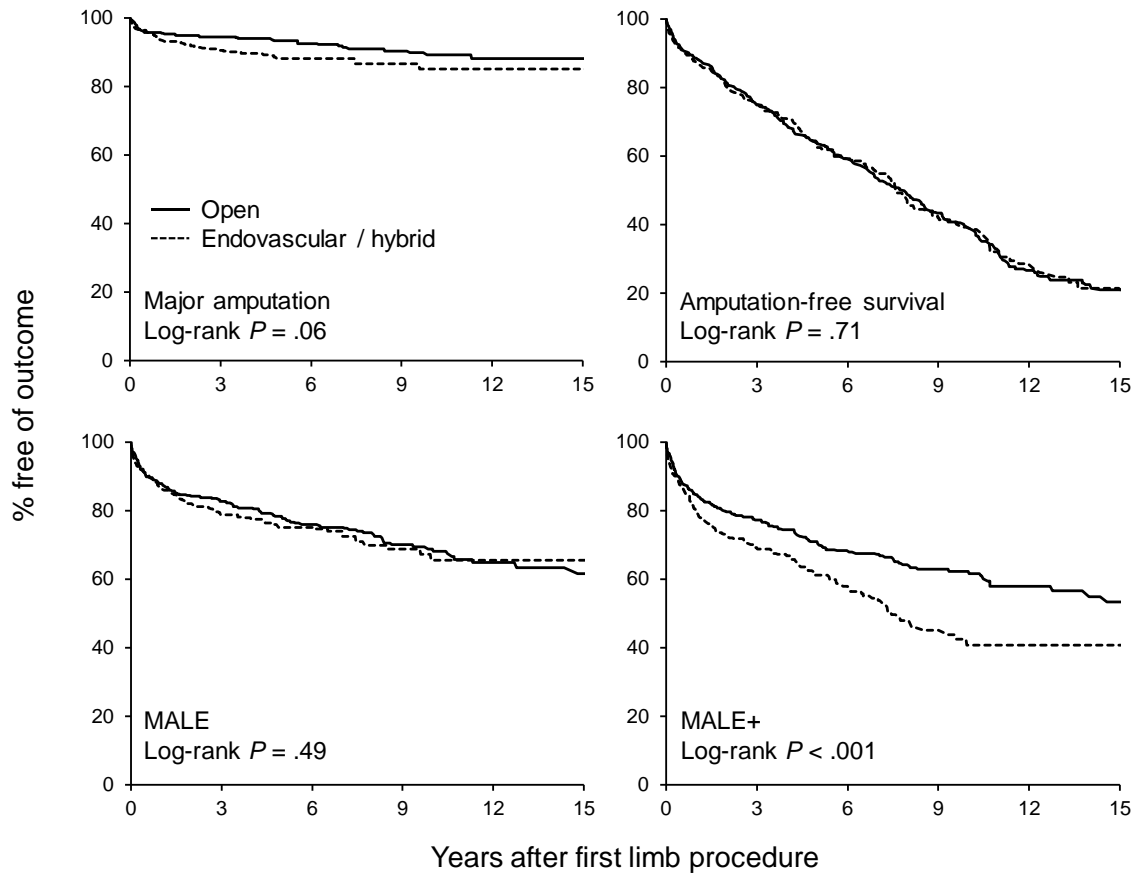

### **Supplemental References**

- 1 Hallett JW, Jr., Byrne J, Gayari MM, Ilstrup DM, Jacobsen SJ, Gray DT. Impact of arterial surgery and balloon angioplasty on amputation: a population-based study of 1155 procedures between 1973 and 1992. *Journal of vascular surgery*. 1997;25(1):29-38.
